# Supplementary material
Source: publisher site journal article supplement (https://www.spandidos-publications.com/1780/downloadSupplementary)

Figure S1. Quality assessment among the included studies using the quality assessment of diagnostic accuracy studies-2 tool (n=30).

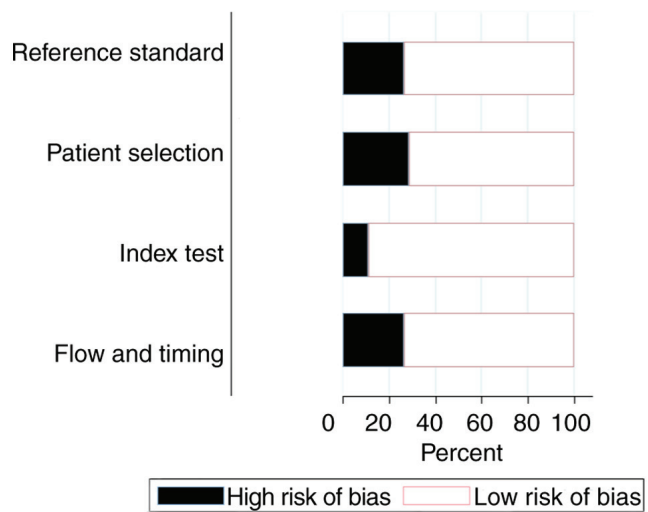

Figure S2. Funnel plot assessing publication bias among studies reporting the diagnostic accuracy of transvaginal ultrasound. ESS, Effective Sample Size.

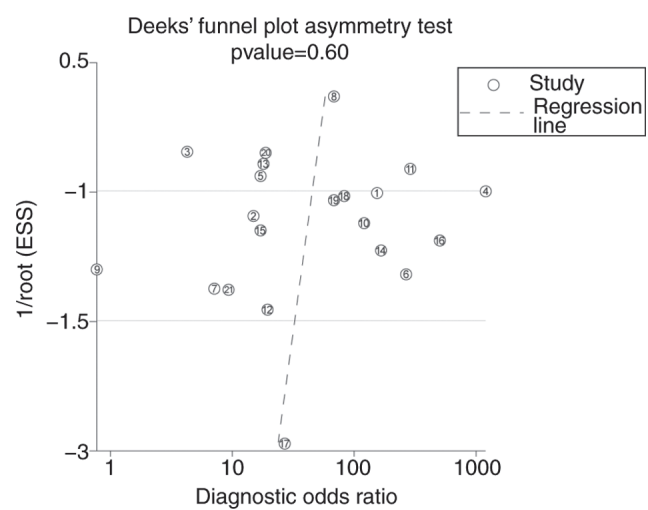

Figure S3. Funnel plot assessing publication bias among studies reporting the diagnostic accuracy of magnetic resonance imaging. ESS, Effective Sample Size.

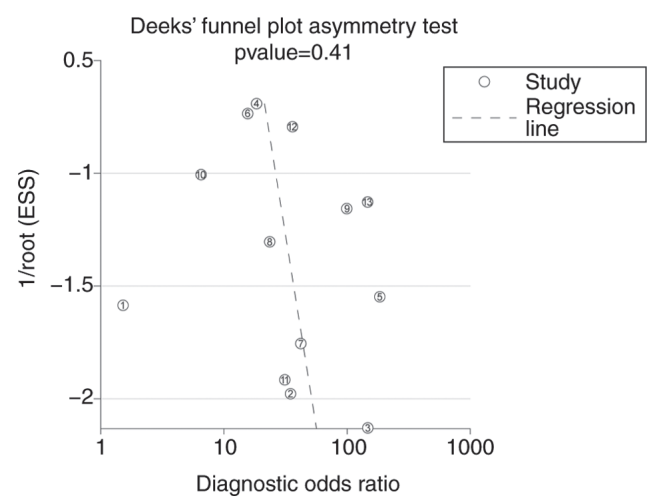

Supplement: Supplementary file 1 [file downloadSupplementary]
